# Supplementary material for: Monodispersed ZnO nanoparticles from a single molecular precursorElectronic supplementary information (ESI) available: characterization data of the molecular precursor and thermolyzed ZnO nanoparticles and gaseous by-products. See http://www.rsc.org/suppdata/cc/b3/b306163a/
Source: Royal Society of Chemistry journal article supplement (doi:10.1039/b306163a), 2003-01-01

## Supplementary information for

Monodispersed ZnO nanoparticles from a single molecular precursor

Chang G. Kim, Kiwhan Sung, Taek-Mo Chung, Duk Y. Jung,a and Yunsoo Kim*

Thin Film Materials Laboratory, Advanced Materials Division, Korea Research Institute of Chemical Technology, Yuseong P.O. Box 107, Daejon 305-600, Korea

E-mail: yunsukim@krict.re.kr

## a*Department of Chemistry, Sungkyunkwan University, Suwon 440-746, Korea*

## Experimental section

**General procedure:**

All manipulations were performed under an inert atmosphere using standard Schlenk line techniques or in a glove box. The solvents and 2-propanol was dried and distilled prior to use. Et2Zn (1.0 M in hexane) purchased from Aldrich Chemical Co. was used without further purification.

**Synthesis of EtZnOiPr**

A 125 mL Schlenk flask was charged with Et2Zn (25 mL, 24 mmol), a magnetic spin bar and 50 mL of hexane. To this reaction mixture, HOiPr (1.5 g, 24 mmol) was added slowly at 0 oC for 10 h. The solution was filtered to remove impurity and the solvent from the filtrate was removed *in vacuo* to yield a white solid product. Finally, pure white crystalline products were obtained by sublimation (at 100 °C and 10-2 Torr) (2.94 g, 80%).

**NMR spectrum of EtZnOiPr**

**1H NMR (300 MHz, C6D6): δ 0.57 (q, CH3C*H2*Zn),**

**1.18 (d, ZnOCH(C*H*3)2 ), 1.53 (t, C*H*3CH2Zn), 3.99 (m, ZnOC*H*(CH3)2 )**

**Preparation of ZnO nanoparticles**

EtZnOiPr (1.5 g, 9.77 mmole) and trioctylphosphine oxide (10 g, 19.54 mmol) were placed into a round-bottom flask equipped with a condenser and a bubbler. The solid mixture was slowly heated to dissolve homogeneously up to 80 C. The clear solution mixture was then stirred at 160 C for 5 h. During the reaction at 160 C, gaseous products were generated. ZnO nanoparticles were separated from the solution by centrifugation after a simple workup, in which the solid product was dissolved in a small amount of toluene and flocculated with the addition of excess methanol. The workup could be repeated several times. 0.75 g of TOPO-stabilized ZnO nanoparticles was obtained after vacuum drying. The yield of the product is 78.7 % based on the Zn content by inductive coupled plasma-atomic emission spectrometry (ICP-AES). The ZnO nanoparticles stabilized with TOPO were well dispersed in organic solvents.

## GC-MS data for the gaseous products collected in a liq. N2 trap: (a) ethane from the products (upper) and a known spectrum of ethane (bottom), (b) propene from the products (upper) and a known spectrum of propene (bottom).


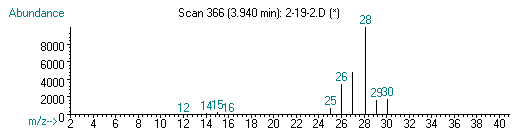


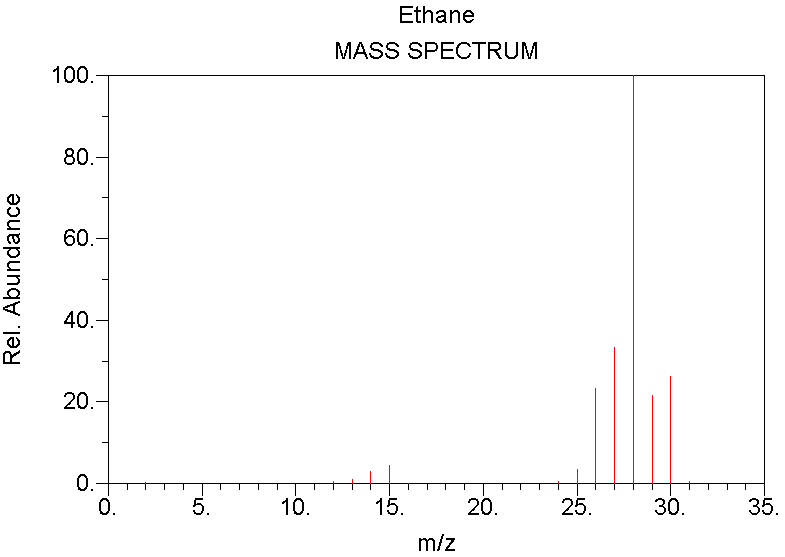


**(a) Ethane from products (upper) and known spectrum of ethane (bottom).**


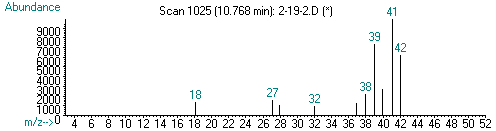


**
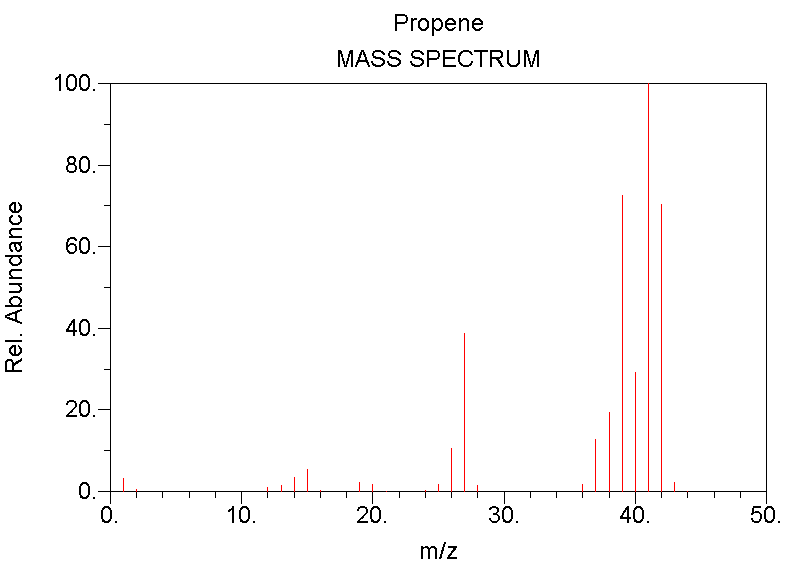
**

**(b) Propene from products (upper) and a known spectrum of propene (bottom).**

**Infrared spectrum of ZnO nanoparticles**

**Energy-dispersive x-ray analysis (EDAX) of ZnO nanoparticles**


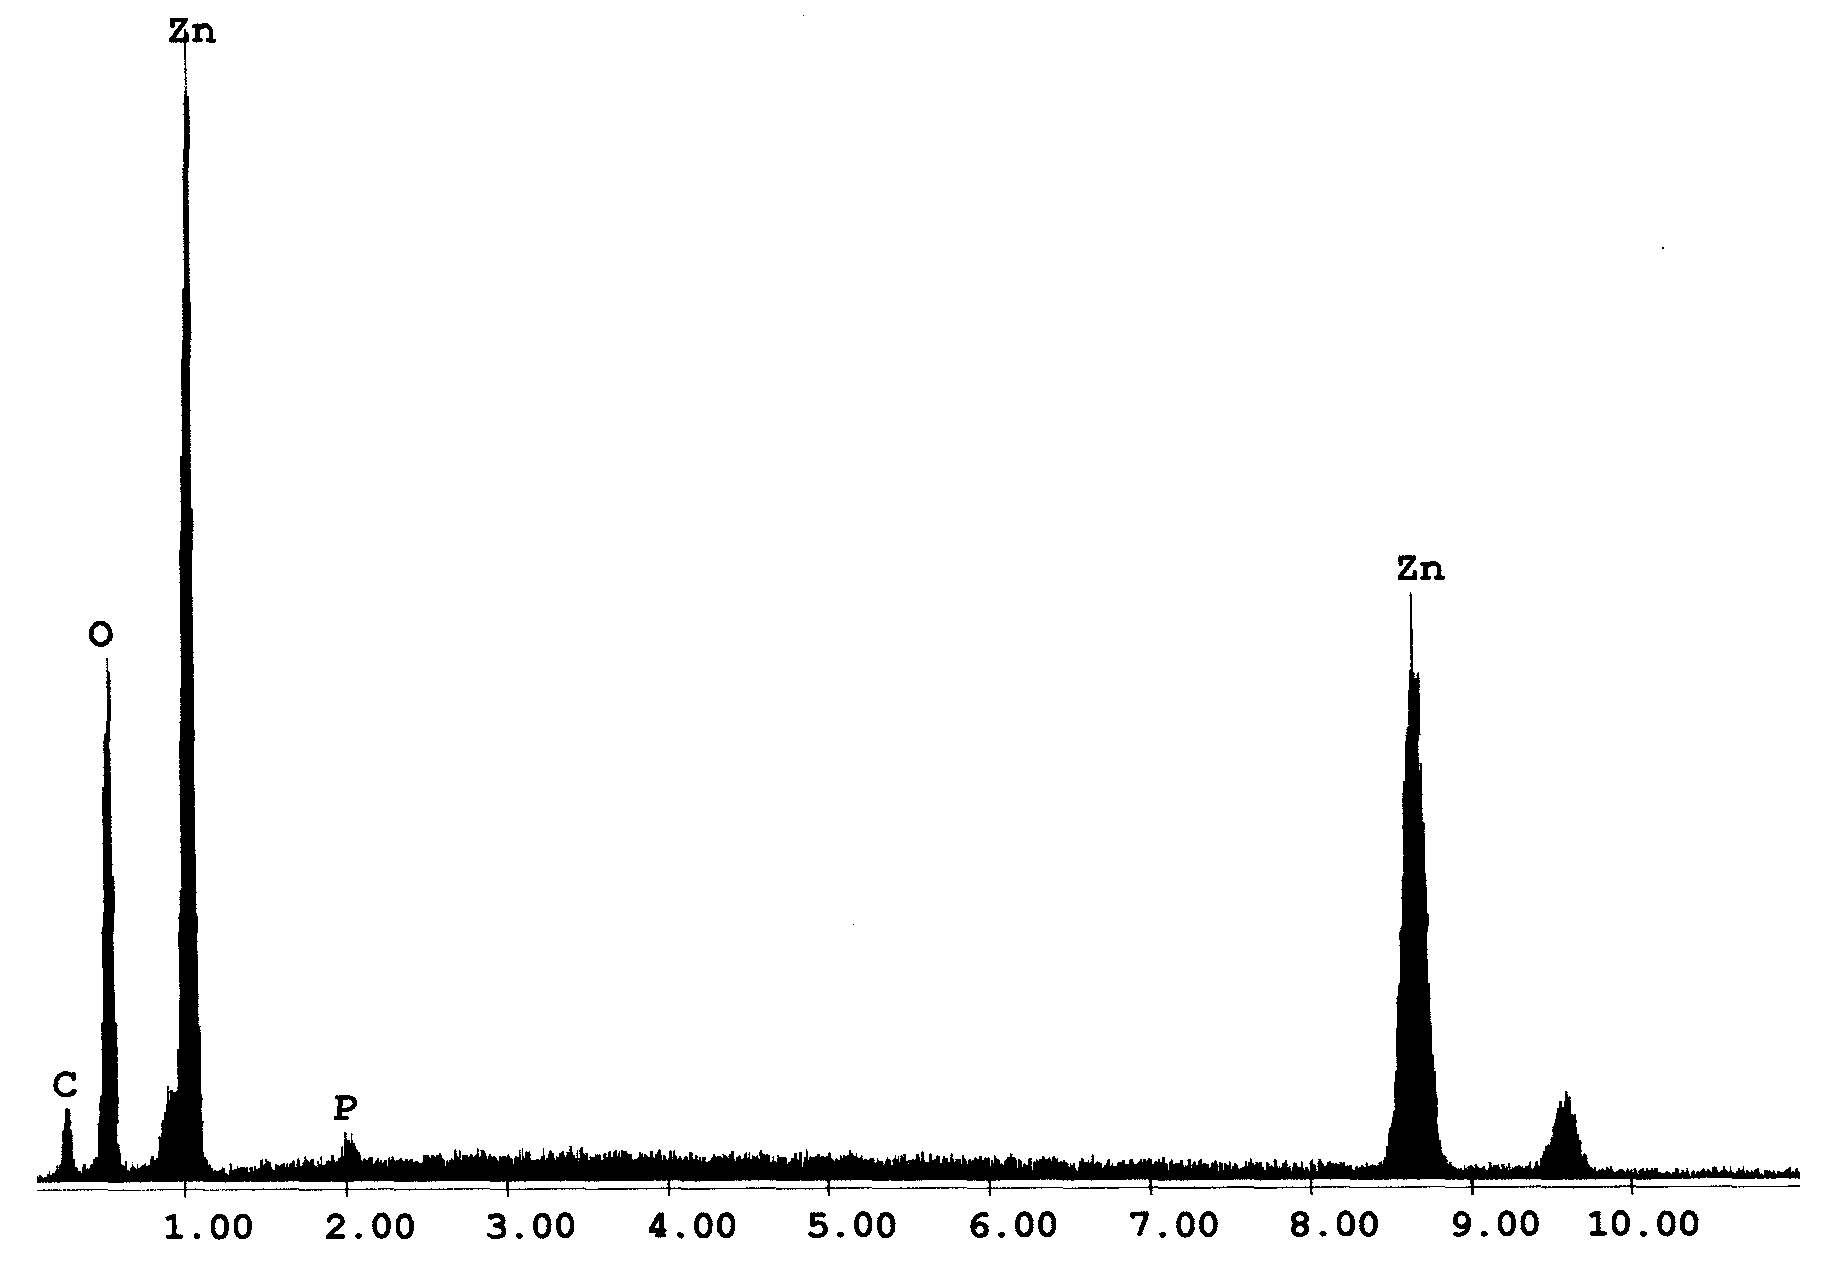

Supplement: b306163a.doc [file b306163a.doc]
